# Supplementary material for: Enzymatic-reaction induced production of polydopamine nanoparticles for sensitive and visual sensing of urea
Source: Royal Society of Chemistry journal article supplement (doi:10.1039/c4an01900h), 2014-11-19
Supplement: c4an01900h1.pdf [file c4an01900h1.pdf]

## Supporting Information

### **Enzymatic-Reaction Induced Production of Polydopamine Nanoparticles for Sensitive and Visual Sensing of Urea**

Nan Li,<sup>a</sup> Hai-Bo Wang,<sup>a</sup> Larissa Thia,<sup>a,b</sup> Jing-Yuan Wang,<sup>b</sup> Xin Wang<sup>\*a</sup>

<sup>a</sup> School of chemical and Biomedical Engineering, Nanyang Technological University,  
62 Nanyang Drive, 637459, Singapore.

<sup>b</sup> Nanyang Environment & Water Research Institute, Nanyang Technological  
University, 1 Cleantech Loop, #06-08 CleanTech One, 637141, Singapore

\* Corresponding author. Tel: +65 6316 8866. Fax: +65 67947553. E-mail:  
WangXin@ntu.edu.sg

## Figures and Tables

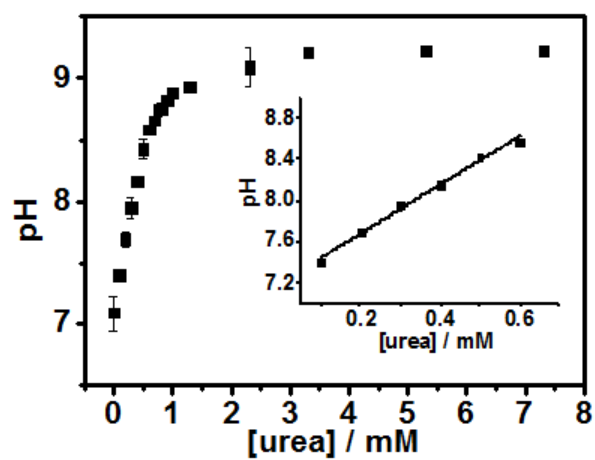

**Figure S1** The pH change of urease-catalyzed hydrolysis of urea in Di-water with different concentration of urea from 0.1 to 7.3 mM at a fixed urease concentration of  $0.3 \text{ mg mL}^{-1}$ . Inset: The linear increase of pH in term of urea concentration.

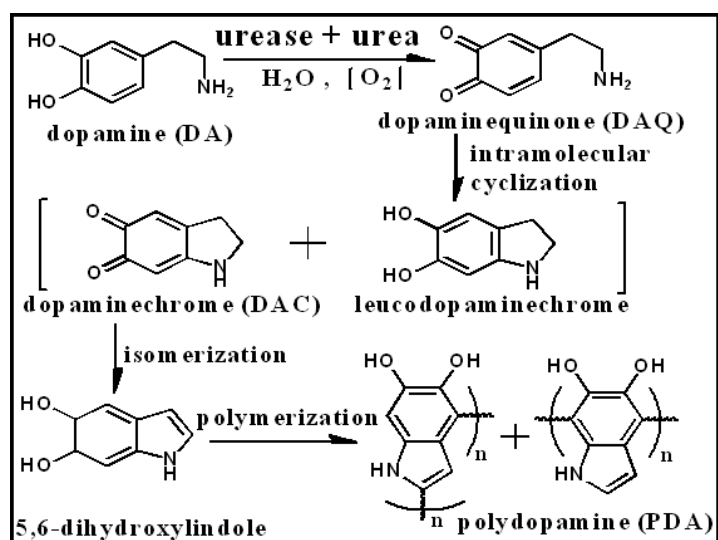

**Figure S2** The proposed pathway for DA polymerization induced by urease/urea enzymatic reaction.

The urease catalytic-reaction triggered generation of PDA CNPs may occur in the following manner: (i) oxidation of the catechol group of dopamine into quinone; (ii) fast reaction of semi-quinone to dopaminequinone (DAQ); (iii) the intramolecular cyclization of DAQ leading to the more readily oxidizable dopaminochrome (DAC); (iv) isomerization of DAC to yield 5, 6 - dihydroxyindole for further polymerization and the self-assembly of small oligomers to PDA CPNs.

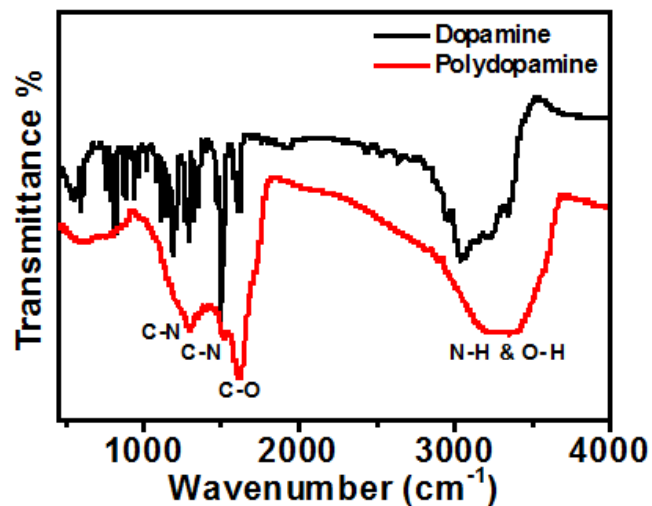

**Figure S3** FTIR spectra (KBr) of DA (black, top) and PDA (red, bottom).

The large, broad band from 3200 — 3500 cm<sup>-1</sup> is attributed to the stretching vibrations (O–H and N–H) of the carboxylic acid, phenolic and aromatic amino functions, as well as hydroxyl structures and water.<sup>1</sup>

**Table S1** Comparison of performance of different methods (the data are taken from the previous reports).

| <b>Method</b>      | <b>Principle</b>                                                        | <b>Linear range (M)</b>                          | <b>Detection limit (<math>\mu\text{M}</math>)</b> | <b>Comments</b>                                            | <b>Reference</b>                                 |
|--------------------|-------------------------------------------------------------------------|--------------------------------------------------|---------------------------------------------------|------------------------------------------------------------|--------------------------------------------------|
| <b>Colorimetry</b> | PDAB as chromogenic reagent                                             | $1.7 - 5 \times 10^{-4}$                         | —                                                 | low cost but low sensitivity,                              | Chin. J. Anal. Lab 2009, 313-315                 |
| <b>IUE</b>         | Immobilization of urease in PPy film for amperometric sensor            | $1 - 3 \times 10^{-4}$                           | —                                                 | responded rapidly, require of robust enzyme entrapment     | Reactive Functional Polymers, 2012, 148-152.     |
| <b>ISE</b>         | Cover ITO electrode by $\text{NH}_4^+$ selective membrane               | $1.3 \times 10^{-6}$<br>to $3 \times 10^{-2}$    | —                                                 | good voltage response and complex fabrication              | Sensors and Actuators B, 2008, 359-366           |
| <b>IC</b>          | Combination of immobilized urease reaction with IC analysis             | $1.3 \times 10^{-5}$<br>to $4.17 \times 10^{-4}$ | 3.3                                               | good selectivity, stability, but low sensitivity           | Analytical Science, 2010, 847-851                |
| <b>FLA</b>         | Application of urease column for fluorimetric FIA                       | $1.0 \times 10^{-6}$<br>to $1.0 \times 10^{-4}$  | —                                                 | automatic and convenient, but complicated                  | Talanta, 2004, 1278-1282                         |
| <b>PL</b>          | Detection of PL intensity of CdSe/ZnS QD                                | $1.0 \times 10^{-5}$<br>to 0.1                   | 10                                                | good sensitivity, hazardous indicator                      | Biosensors and Bioelectronics, 2007, 1835-1838   |
| <b>RS</b>          | Enhancement of RS intensity of $\text{NH}_4$ -TPB by urea decomposition | $1.25 \times 10^{-7}$<br>to $1.5 \times 10^{-5}$ | 0.058                                             | good selectivity and sensitivity                           | Bioprocess Biosystems Engineering, 2011, 639-645 |
| <b>PDA</b>         | DA polymerization induced by urease catalyzed urea hydrolysis           | $1.0 \times 10^{-7}$<br>to $1.0 \times 10^{-3}$  | 0.1                                               | Sensitivity, easy visualization, and no sensor fabrication | This assay                                       |

*PDAB* *p*-dimethylaminobenzaldehyde, *IUE* immobilized urease electrode, *PPy* Polypyrrole, *ISE* ion selective electrode, *ITO* indium tin oxide, *IC* ion chromatograph, *FIA* flow-injection analysis, *PL* photoluminescence, *QD* quantum dots, *RS* resonance scattering, *TPB* tetraphenyl boron, *PDA* DA polymerization.

(1) Dreyer, D. R.; Miller, D. J.; Freeman, B. D.; Paul, D. R.; Bielawski, C. W. *Langmuir* **2012**, *28*, 6428-6435.
